# Supplementary material for: Anion-exchange synthesis of an MnCo2S4 electrocatalyst towards facilitated ultralong hydrogen evolution reaction in acidic and alkaline media
Source: Royal Society of Chemistry journal article supplement (doi:10.1039/d3ce01009k), 2023-12-04
Supplement: d3ce01009k1.pdf [file d3ce01009k1.pdf]

## Supporting Information

### **Anion-exchange synthesis of an $\text{MnCo}_2\text{S}_4$ electrocatalyst towards facilitated ultralong hydrogen evolution reaction in acidic and alkaline Media**

Abu Talha Aqueel Ahmed <sup>a</sup>, Sankar Sekar <sup>a,b</sup>, Shubhangi S. Khadtare <sup>c</sup>, Nurul Taufiqu  
Rochman <sup>d</sup>, Chinna Bathula <sup>e</sup>, Abu Saad Ansari <sup>d\*</sup>

*<sup>a</sup> Division of Physics and Semiconductor Science, Dongguk University, Seoul 04620, South Korea*

*<sup>b</sup> Quantum-functional Semiconductor Research Center, Dongguk University-Seoul, Seoul 04620, Republic of Korea*

*<sup>c</sup> Innovative Compound Semiconductor and Application Laboratory, Department of Electronic and Computer Engineering, Hanyang University, Seoul 04763, Republic of Korea*

*<sup>d</sup> Nano Center Indonesia Research Institute, Puspiptek street, South Tangerang, Banten 15314, Indonesia*

*<sup>e</sup> Division of Electronics and Electrical Engineering, Dongguk University, Seoul 04620, South Korea*

Corresponding Author: [abusaadphy@gmail.com](mailto:abusaadphy@gmail.com)

## Contents:

|    |                                                                                                                                                                                                                                                                                                                                                                                                         |    |
|----|---------------------------------------------------------------------------------------------------------------------------------------------------------------------------------------------------------------------------------------------------------------------------------------------------------------------------------------------------------------------------------------------------------|----|
| 1. | Table S1. Comparative electrochemical HER performance of various transition metal-based catalysts and the proposed MnCo <sub>2</sub> S <sub>4</sub> catalysts in an acidic 0.5 M H <sub>2</sub> SO <sub>4</sub> and alkaline 1.0 M KOH medium.....                                                                                                                                                      | S3 |
| 2. | Fig. S1. EDS spectra for (a) MnCo <sub>2</sub> O <sub>4</sub> and (b) MnCo <sub>2</sub> S <sub>4</sub> electrodes, which confirms the complete transformation of oxide phase into sulfide form.....                                                                                                                                                                                                     | S4 |
| 3. | Fig. S2. EIS plots measured before and after stability in (a) alkaline 1 M KOH and (b) acidic 0.5 M H <sub>2</sub> SO <sub>4</sub> medium. (c) Reliability graph for MnCo <sub>2</sub> O <sub>4</sub> catalyst performance in acidic and alkaline media.....                                                                                                                                            | S5 |
| 4. | Table S2. EIS fitted parameters for MnCo <sub>2</sub> O <sub>4</sub> and MnCo <sub>2</sub> S <sub>4</sub> catalysts measured before and after stability.....                                                                                                                                                                                                                                            | S5 |
| 5. | Fig. S3. Non-Faradaic scan rate-dependent CV curves for (a) MnCo <sub>2</sub> O <sub>4</sub> and (b) MnCo <sub>2</sub> S <sub>4</sub> catalysts recorded in a voltage window range between -0.10 and 0.00 V (vs. RHE). (c) “ <i>J vs. ν</i> ” plot of MnCo <sub>2</sub> O <sub>4</sub> and MnCo <sub>2</sub> S <sub>4</sub> catalysts for the estimation of <i>C<sub>DL</sub></i> and <i>ECSA</i> ..... | S6 |
| 6. | Table S3. Estimated <i>C<sub>DL</sub></i> and <i>ECSA</i> values for MnCo <sub>2</sub> O <sub>4</sub> and MnCo <sub>2</sub> S <sub>4</sub> catalysts in alkaline KOH medium.....                                                                                                                                                                                                                        | S6 |
| 7. | Fig. S4. (a) “ <i>V vs. TOF</i> ” plots and (b) <i>ECSA</i> -corrected LSV curves for MnCo <sub>2</sub> O <sub>4</sub> and MnCo <sub>2</sub> S <sub>4</sub> catalysts measured at 1.0 mV s <sup>-1</sup> in an acidic (0.5 M H <sub>2</sub> SO <sub>4</sub> ) and alkaline (1 M KOH) media.....                                                                                                         | S7 |
| 8. | Fig. S5. Post-stability measured (a) Co 2p, (b) Mn 2p, and (c) S 2p high-resolution XPS emission spectra of MnCo <sub>2</sub> S <sub>4</sub> catalyst.....                                                                                                                                                                                                                                              | S8 |
| 9. | Supporting References.....                                                                                                                                                                                                                                                                                                                                                                              | S9 |

**Table S1.** Comparative electrochemical HER performance of various transition metal-based catalysts and the proposed MnCo<sub>2</sub>S<sub>4</sub> catalysts in an acidic 0.5 M H<sub>2</sub>SO<sub>4</sub> and alkaline 1.0 M KOH medium.

| Obs. No. | HER catalysts                                | Electrolyte                          | Overpotential ( $\eta$ ; mV) at $-10 \text{ mA cm}^{-2}$ | Tafel Slope ( $\text{mV dec}^{-1}$ ) | Ref.                |
|----------|----------------------------------------------|--------------------------------------|----------------------------------------------------------|--------------------------------------|---------------------|
| 1        | Co:FeS <sub>2</sub> /CoS <sub>2</sub> @20 °C | 0.5 M H <sub>2</sub> SO <sub>4</sub> | -90                                                      | 66                                   | S1                  |
| 2        | Mn-N-Co <sub>9</sub> S <sub>8</sub>          | 1 M KOH                              | -102                                                     | 107.2                                | S2                  |
| 3        | FeO@CCS                                      | 1 M KOH                              | -107                                                     | 136                                  | 25                  |
| 4        | N-CoS <sub>2</sub>                           | 0.5 M H <sub>2</sub> SO <sub>4</sub> | -97                                                      | 101                                  | 26                  |
|          |                                              | 1 M KOH                              | -137                                                     | 117                                  |                     |
| 5        | Ce-MnCo <sub>2</sub> O <sub>4</sub> -3%      | 1 M KOH                              | -389                                                     | 96                                   | S3                  |
| 6        | MnCo <sub>2</sub> S <sub>4</sub>             | 1 M KOH                              | -167                                                     | 136.74                               | 30                  |
| 7        | MCO@NiFe LDH                                 | 1 M KOH                              | -129                                                     | 112.5                                | 21                  |
| 9        | (AgCuZnMnCoInGa)S                            | 0.5 M H <sub>2</sub> SO <sub>4</sub> | -255                                                     | 131.6                                | S4                  |
| 9        | Pt/NiS@Al <sub>2</sub> O <sub>3</sub>        | 0.5 M H <sub>2</sub> SO <sub>4</sub> | -34                                                      | ~ 35                                 | S5                  |
| 10       | Pt/NiS@Al <sub>2</sub> O <sub>3</sub>        | 0.5 M H <sub>2</sub> SO <sub>4</sub> | -34                                                      | ~ 35                                 | S6                  |
| 11       | MnCo <sub>2</sub> O <sub>4</sub> nanosheets  | 0.5 M H <sub>2</sub> SO <sub>4</sub> | -138                                                     | 119                                  | <b>Present Work</b> |
|          |                                              | 1 M KOH                              | -149                                                     | 128                                  |                     |
| 12       | MnCo <sub>2</sub> S <sub>4</sub> nanosheets  | 0.5 M H <sub>2</sub> SO <sub>4</sub> | -111                                                     | 55                                   |                     |
|          |                                              | 1 M KOH                              | -124                                                     | 63                                   |                     |

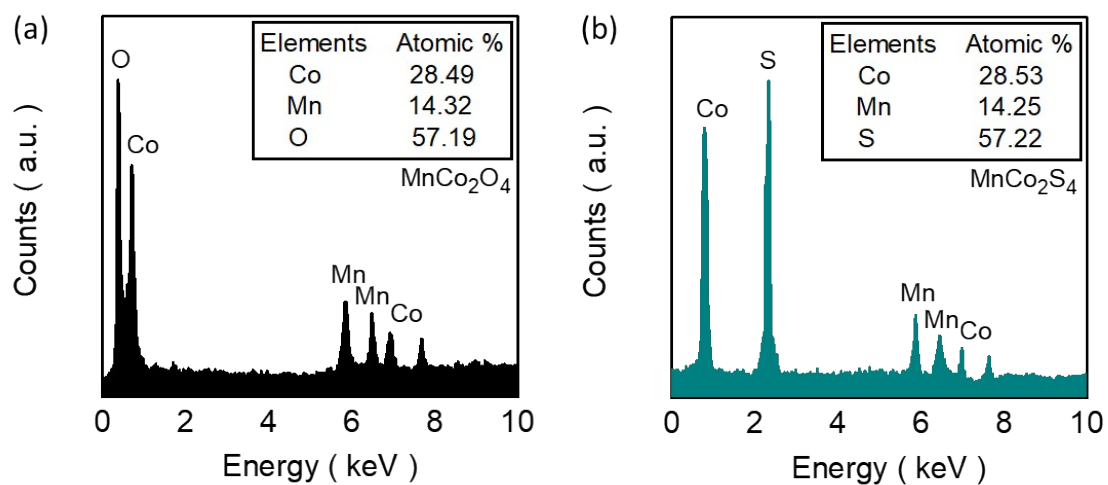

**Fig. S1.** EDS spectra for (a) MnCo<sub>2</sub>O<sub>4</sub> and (b) MnCo<sub>2</sub>S<sub>4</sub> electrodes, which confirms the complete transformation of oxide phase into sulfide form.

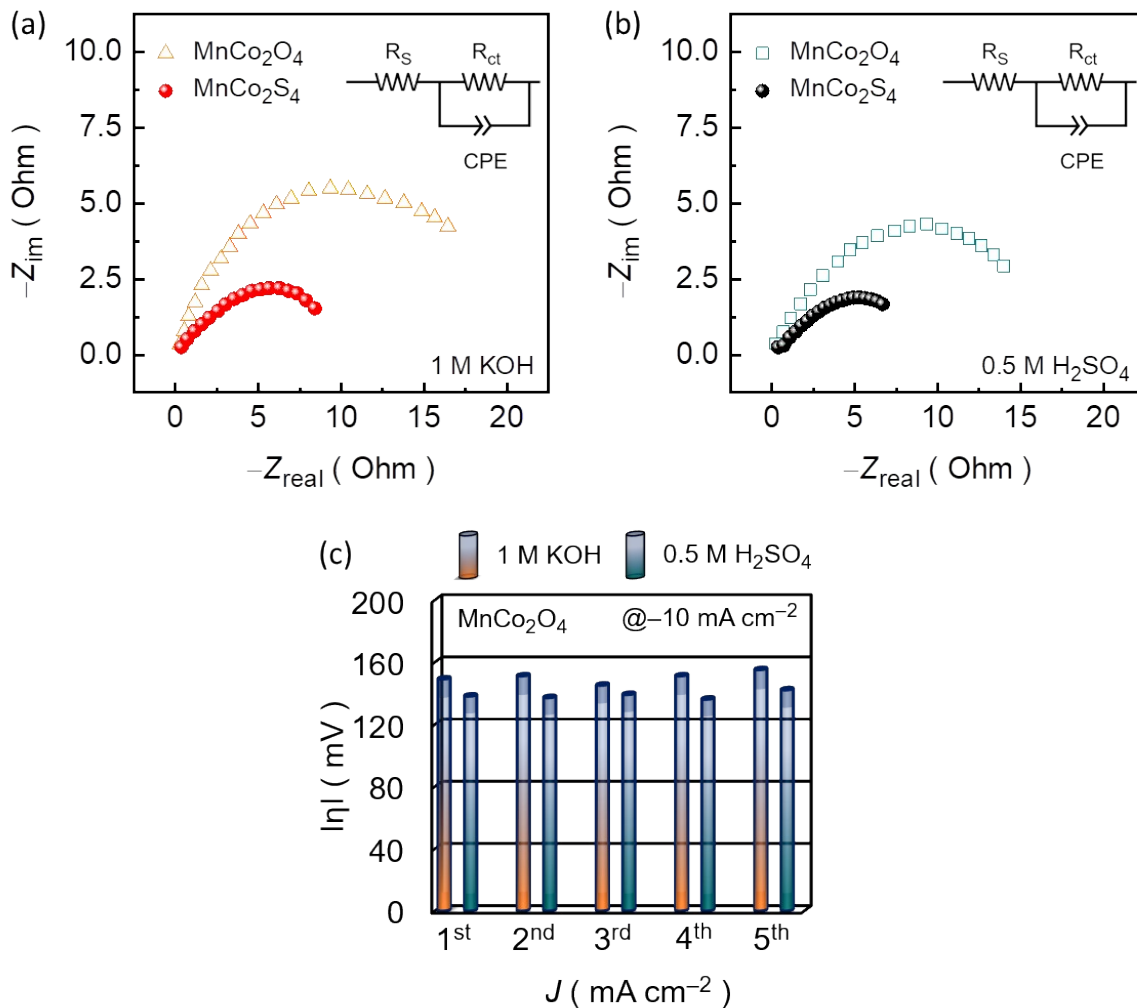

**Fig. S2.** EIS plots measured before and after stability in (a) alkaline 1 M KOH and (b) acidic 0.5 M H<sub>2</sub>SO<sub>4</sub> medium. (c) Reliability graph for MnCo<sub>2</sub>O<sub>4</sub> catalyst performance in acidic and alkaline media.

**Table S2.** EIS fitted parameters for MnCo<sub>2</sub>O<sub>4</sub> and MnCo<sub>2</sub>S<sub>4</sub> catalysts measured before and after stability.

| MnCo <sub>2</sub> S <sub>4</sub>     | Before stability   |                       | After HER stability |                       |
|--------------------------------------|--------------------|-----------------------|---------------------|-----------------------|
|                                      | $R_s$ ( $\Omega$ ) | $R_{ct}$ ( $\Omega$ ) | $R_s$ ( $\Omega$ )  | $R_{ct}$ ( $\Omega$ ) |
| 1 M KOH                              | 0.368              | 8.488                 | 0.394               | 9.113                 |
| 0.5 M H <sub>2</sub> SO <sub>4</sub> | 0.358              | 6.811                 | 0.379               | 7.345                 |

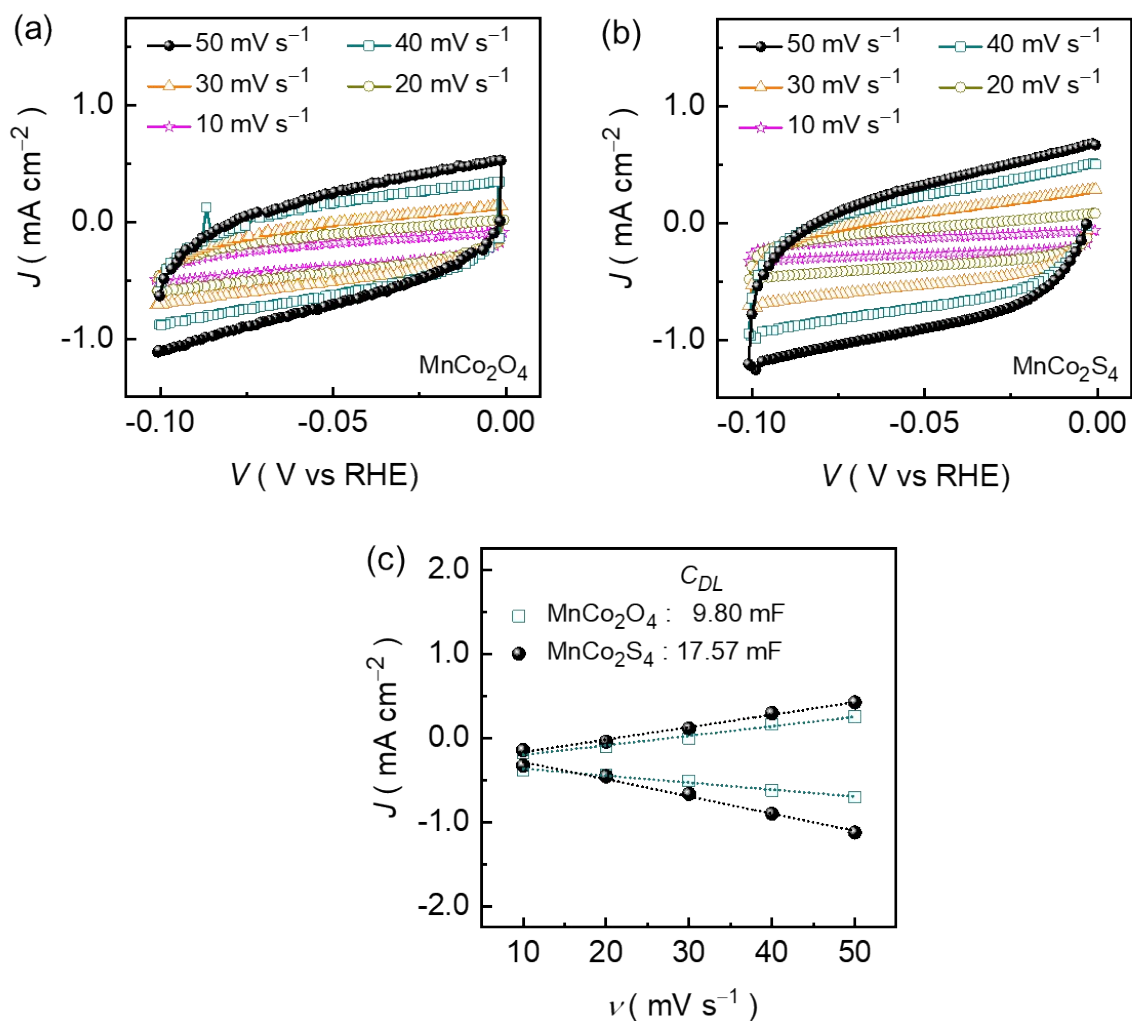

**Fig. S3.** Non-Faradaic scan rate-dependent CV curves for (a) MnCo<sub>2</sub>O<sub>4</sub> and (b) MnCo<sub>2</sub>S<sub>4</sub> catalysts recorded in a voltage window range between -0.10 and 0.00 V (vs. RHE). (c) “ $J$  vs.  $\nu$ ” plot of MnCo<sub>2</sub>O<sub>4</sub> and MnCo<sub>2</sub>S<sub>4</sub> catalysts for the estimation of  $C_{DL}$  and  $ECSA$ .

**Table S3.** Estimated  $C_{DL}$  and  $ECSA$  values for MnCo<sub>2</sub>O<sub>4</sub> and MnCo<sub>2</sub>S<sub>4</sub> catalysts in alkaline KOH medium.

| Catalysts                        | $C_{DL}$ (mF) | $ECSA$ (cm <sup>2</sup> ) |
|----------------------------------|---------------|---------------------------|
| MnCo <sub>2</sub> O <sub>4</sub> | 9.80          | 245                       |
| MnCo <sub>2</sub> S <sub>4</sub> | 17.57         | ~ 439                     |

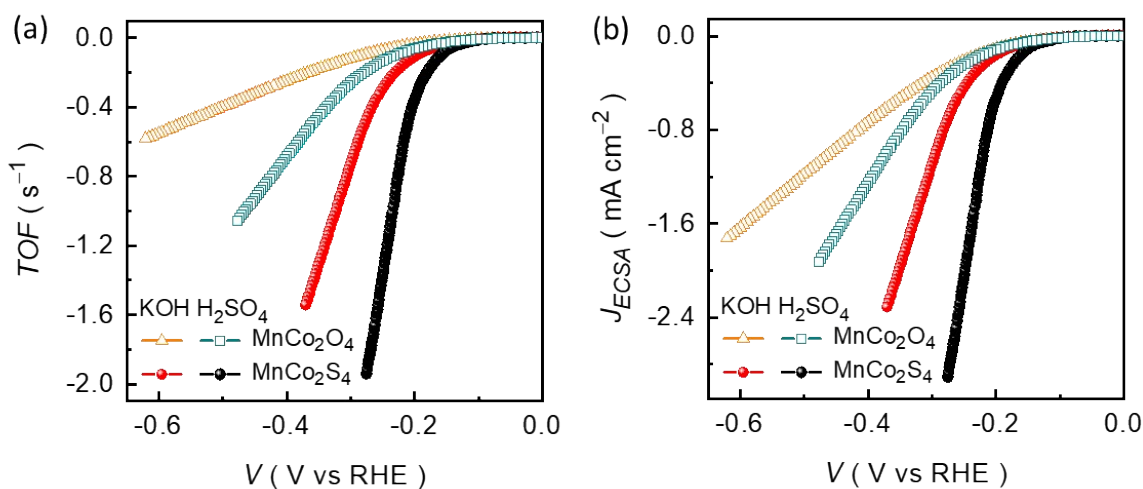

**Fig. S4.** (a) “ $V$  vs.  $TOF$ ” plots and (b)  $ECSA$ -corrected LSV curves for  $MnCo_2O_4$  and  $MnCo_2S_4$  catalysts measured at  $1.0 \text{ mV s}^{-1}$  in an acidic ( $0.5 \text{ M H}_2\text{SO}_4$ ) and alkaline ( $1 \text{ M KOH}$ ) media.

The intrinsic reaction kinetics of the catalyst can be assessed by estimating the  $TOF$  values. Fig. S4a shows the “ $V$  vs.  $TOF$ ” plots for the  $MnCo_2O_4$  and  $MnCo_2S_4$  catalysts calculated from the following equation as:

$$TOF = (J \times A) / (F \times n \times N) \quad (S1)$$

where  $J$ ,  $A$ ,  $n$ ,  $N$ , and  $F$  signifies the current density, active catalyst loading area ( $1 \times 1 \text{ cm}^2$ ), Faraday constant ( $96,485.3329 \text{ A s mol}^{-1}$ ), the number of moles of catalyst, and number of electrons  $\text{mol}^{-1}$  (for HER;  $N = 2$ ), respectively. The  $MnCo_2O_4$  catalyst demonstrates the  $TOF$  of  $-1.9393$  and  $-0.4658 \text{ s}^{-1}$  at  $-0.275 \text{ V}$  in acidic and alkaline electrolyte media, respectively, which is comparatively lower than the  $MnCo_2S_4$  catalysts ( $-0.1964$  and  $-0.0980 \text{ s}^{-1}$ ) at the same potential value. The  $TOF$  for  $MnCo_2S_4$  is almost 10- and 4-fold compared to pristine  $MnCo_2O_4$  nanosheet catalyst in acidic and alkaline media, indicating that after anion-exchange the intrinsic reaction kinetics improved significantly, which results in the efficient transportation of electron/ion throughout the 2D nanosheets. Moreover,  $ECSA$ -corrected

( $J_{ECSA}$ ) LSV curves further highlights the HER reaction kinetics, as shown in Fig. S4b catalysts. The  $J_{ECSA}$  plots reveals that the  $\text{MnCo}_2\text{S}_4$  catalyst exhibits the smaller voltage response at each  $J_{ECSA}$  compared to the pristine  $\text{MnCo}_2\text{O}_4$  catalyst, suggesting that  $\text{MnCo}_2\text{S}_4$  catalyst has better intrinsic reaction kinetics.

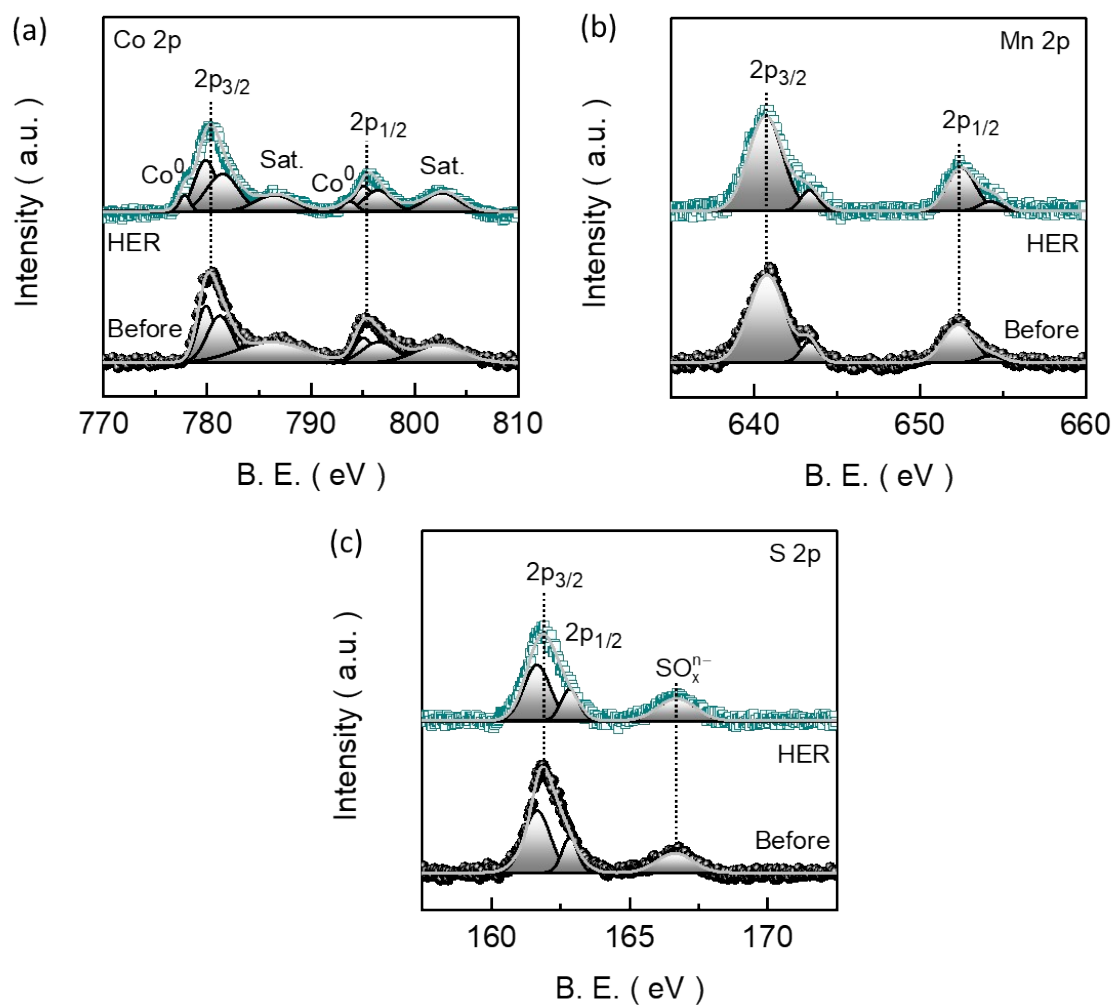

**Fig. S5.** Post-stability measured (a) Co 2p, (b) Mn 2p, and (c) S 2p high-resolution XPS emission spectra of  $\text{MnCo}_2\text{S}_4$  catalyst.



## Supporting References

- S1. K. Wang, H. Song, Z. Lin, Y. Gao, H. Wu, S. Yan, J. Wang and Y. Shi, *Materials Express*, 2019, **9**, 786-791.
- S2. Y. Xing, D. Li, L. Li, H. Tong, D. Jiang and W. Shi, *International Journal of Hydrogen Energy*, 2021, **46**, 7989-8001.
- S3. X. Huang, H. Zheng, G. Lu, P. Wang, L. Xing, J. Wang and G. Wang, *ACS Sustainable Chemistry & Engineering*, 2019, **7**, 1169-1177.
- S4. W. Xiao, Y. Li, A. Elgendy, E. C. Duran, M. A. Buckingham, B. F. Spencer, B. Han, F. Alam, X. Zhong, S. H. Cartmell, R. J. Cernik, A. S. Eggeman, R. A. W. Dryfe and D. J. Lewis, *Chemistry of Materials*, 2023, **35**, 7904-7914.
- S5. Y. Feng, Y. Guan, H. Zhang, Z. Huang, J. Li, Z. Jiang, X. Gu and Y. Wang, *Journal of Materials Chemistry A*, 2018, **6**, 11783-11789.
- S6. G. Ghanashyam and H. Kyung Jeong, *Inorganica Chimica Acta*, 2022, **541**, 121098.
